# Supplementary material for: Trimethylamine emissions in animal husbandry
Source: Copernicus journal article supplement (doi:10.5194/bg-11-5073-2014), 2014-09-19
Supplement: Supplementary file 2 [file bg-11-5073-2014-supplement.zip]

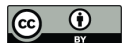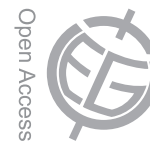

## *Supplement of*

# **Trimethylamine emissions in animal husbandry**

**J. Sintermann et al.**

*Correspondence to:* J. Sintermann ([joerg.sintermann@agroscope.admin.ch](mailto:joerg.sintermann@agroscope.admin.ch)) and A. Neftel ([albrecht.neftel@agroscope.admin.ch](mailto:albrecht.neftel@agroscope.admin.ch))

- Supplement-Cover-Letter.pdf
- Supplement.docx
- Supplement.pdf
- bgd-2014-0207-fA1.png
